# Supplementary figures and images for: Denaturation bubble-mediated two-stage isothermal nucleic acid amplification in a single closed tube
Source: Royal Society of Chemistry journal article supplement (doi:10.1039/d3cc00640a), 2023-01-01

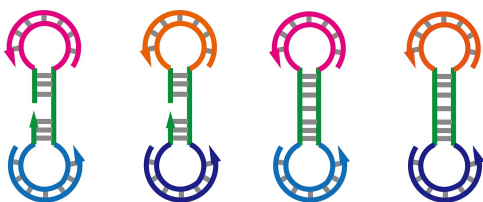

**M**

**1**

**2**

**3**

**4**

**100-bp** —  
**75-bp** —

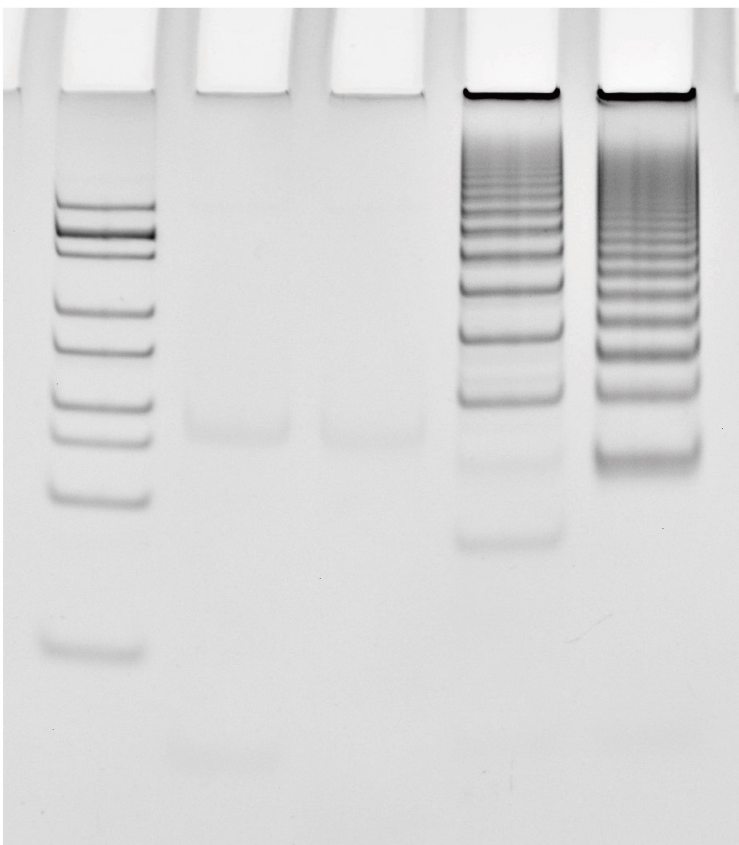

Supplement: d3cc00640a2.pdf [file d3cc00640a2.pdf]

**A**

| Lane    | 1 | 2 | 3 | 4 | 5 | 6 | 7 |
|---------|---|---|---|---|---|---|---|
| Target  | + | + | + | + | - | - | - |
| Primers | + | + | - | - | + | + | - |
| DPs     | + | - | + | - | + | - | + |

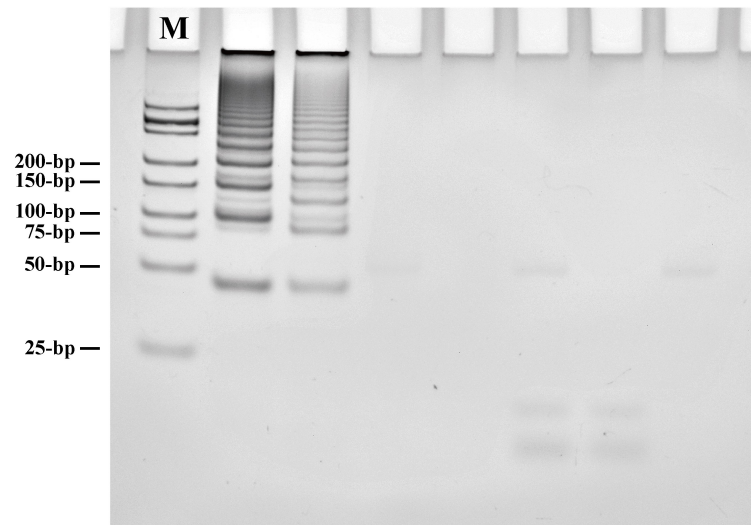

**B**

| Lane    | 1 | 2 | 3 | 4 | 5 | 6 | 7 |
|---------|---|---|---|---|---|---|---|
| Target  | + | + | + | + | - | - | - |
| Primers | + | + | - | - | + | + | - |
| DPs     | + | - | + | - | + | - | + |

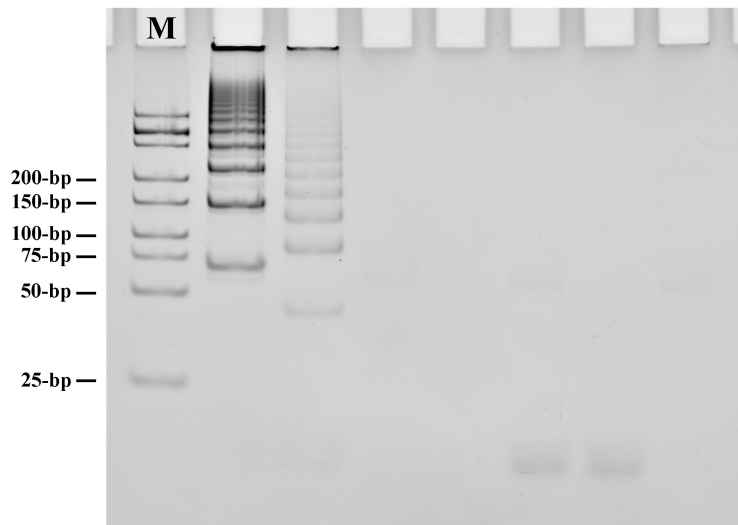

Supplement: d3cc00640a3.pdf [file d3cc00640a3.pdf]

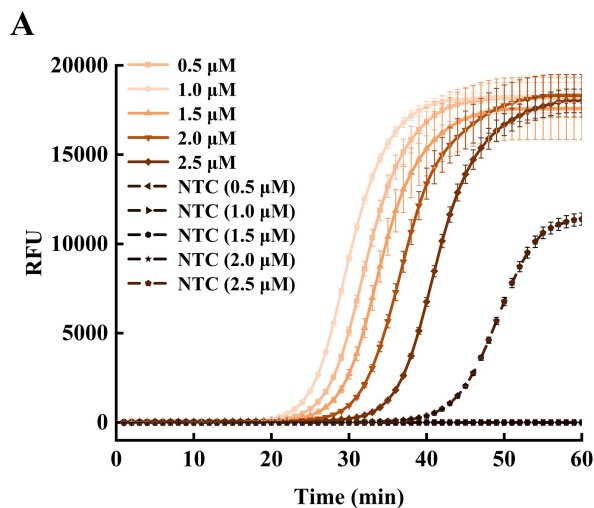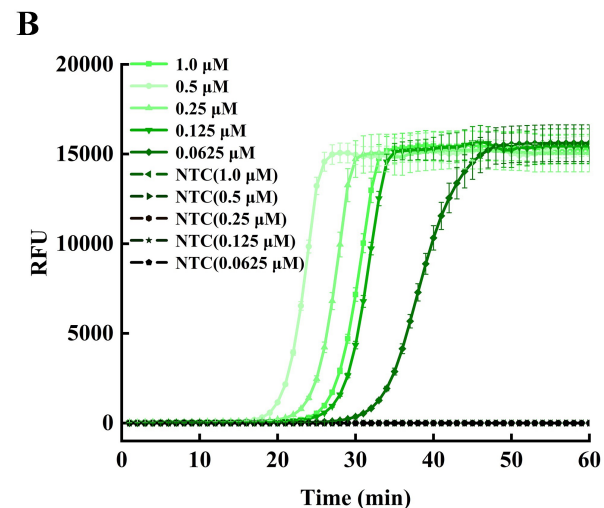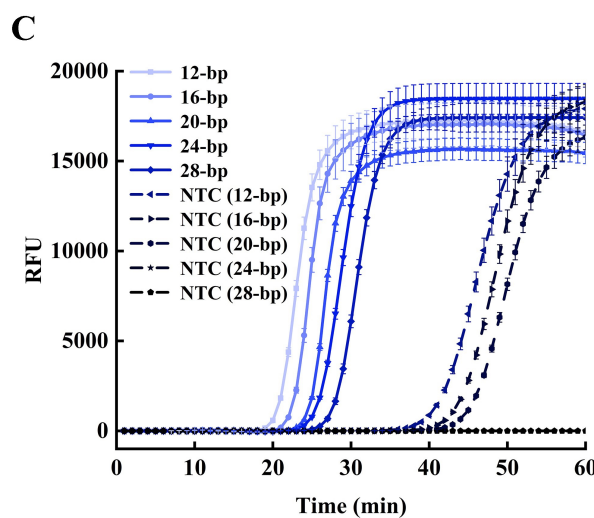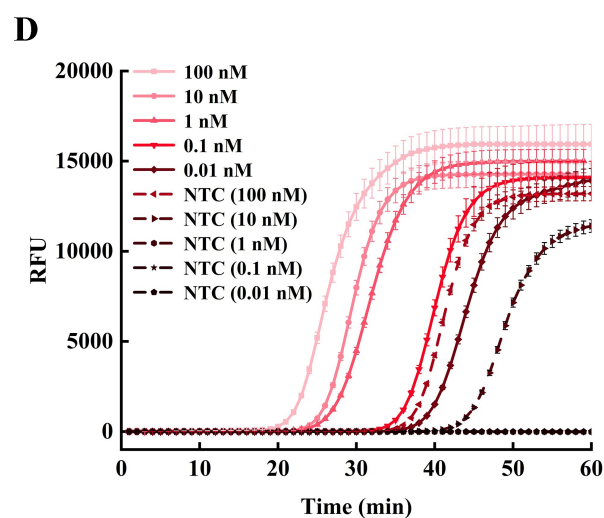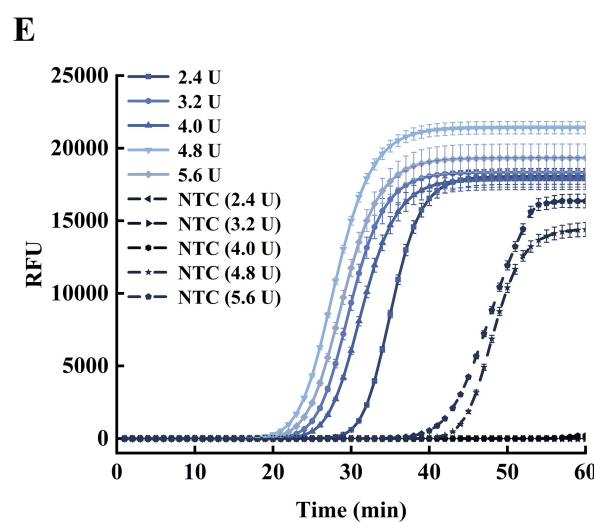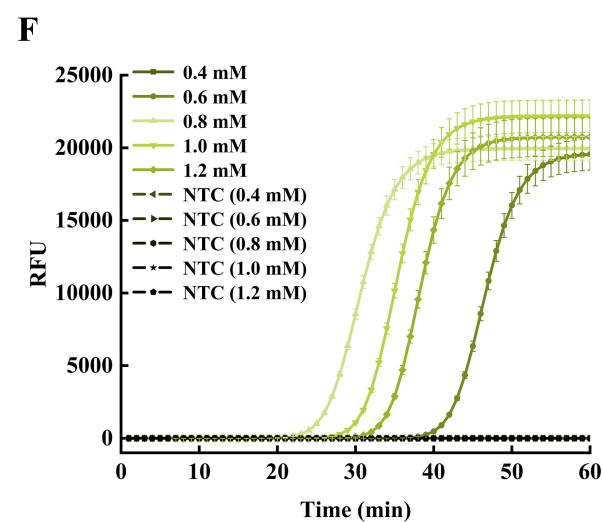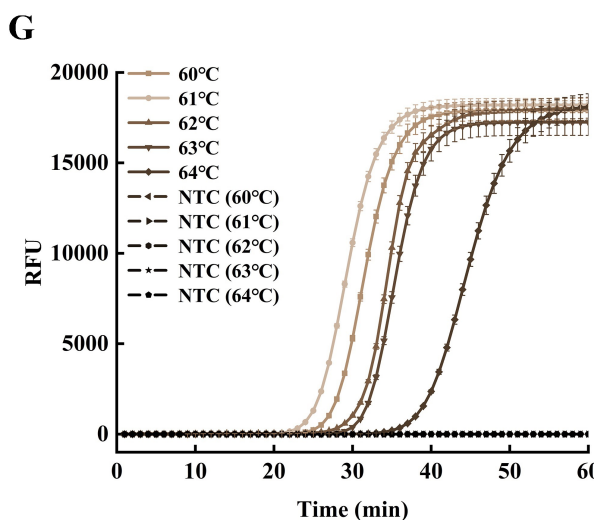

Supplement: d3cc00640a4.pdf [file d3cc00640a4.pdf]

**A**

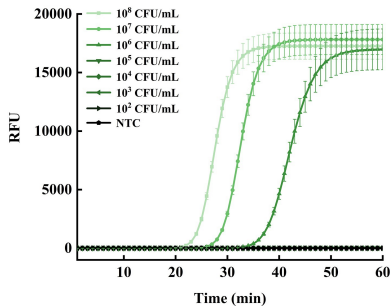

**B**

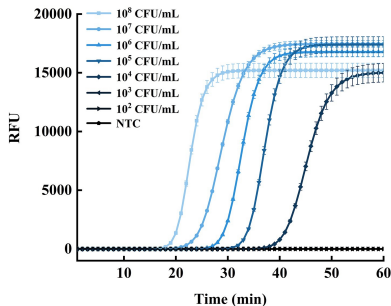

**C**

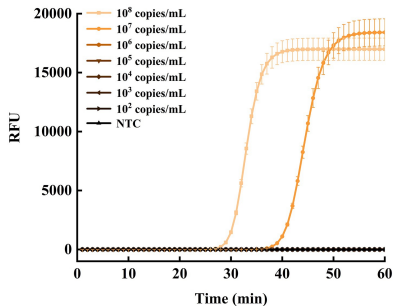

**D**

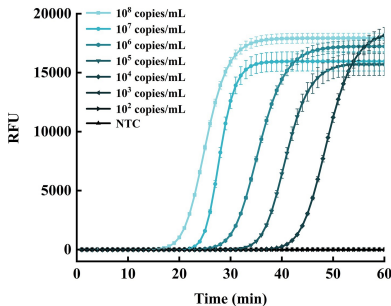

Supplement: d3cc00640a5.pdf [file d3cc00640a5.pdf]

**A**

*S. aureus* (CFU/mL)

RC-SEA

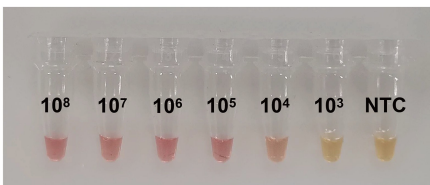

SEA

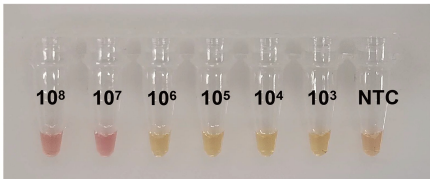

LAMP

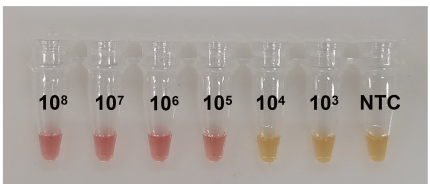

**B**

SARS-CoV-2 RNA (copies/mL)

RC-SEA

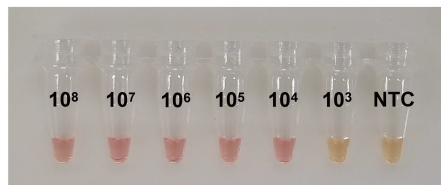

SEA

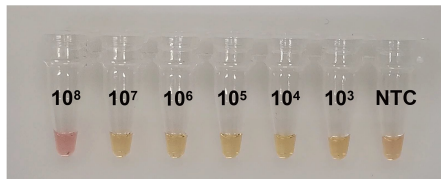

LAMP

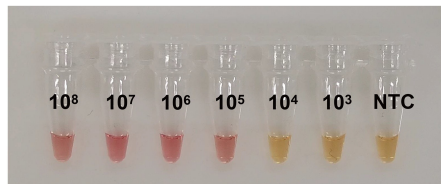

Supplement: d3cc00640a6.pdf [file d3cc00640a6.pdf]
